# Supplementary material for: An ethnobotanical analysis of parasitic plants (Parijibi) in the Nepal Himalaya
Source: PubMed Central journal article supplement (PMC4765049; doi:10.1186/s13002-016-0086-y), 2016-02-24
Supplement: 13002_2016_86_MOESM1_ESM.pdf [file 13002_2016_86_MOESM1_ESM.pdf]

**Appendix I.** Parasitic plant species found in Nepal. Nepal-specific data, including host species, are presented. (Shrestha 1998; Oleg and Stainton 2000; Manandhar 2002; Press et al. 2000), KATH 2013; TUCH 2013; TPL 2013; eFloras 2013; Tropicos 2013).

**Key:** Distribution information is abbreviated by E (Eastern), C (Central), and W (West) based on Nepal's three vegetative zones. N/A denotes where information is not available.

| SNo. | Species                                                  | Family          | Distribution | Altitude (m) | Habit                         | Recorded Hosts                                                                                                                                                                                                                                                                                                                  | Flowering Time      | Fruiting Time       |
|------|----------------------------------------------------------|-----------------|--------------|--------------|-------------------------------|---------------------------------------------------------------------------------------------------------------------------------------------------------------------------------------------------------------------------------------------------------------------------------------------------------------------------------|---------------------|---------------------|
| 1    | <i>Dufrenoya granulata</i> (Hook. F. & Thomson) Stauffer | Amphorogynaceae | C.E.         | 1600 - 2400  | Facultative root hemiparasite | Fagaceae, Malvaceae, Moraceae                                                                                                                                                                                                                                                                                                   | May - August        | September - October |
| 2    | <i>Dufrenoya platyphylla</i> (Spreng.) Stauffer.         | Amphorogynaceae | C.E.         | 1200 - 2000  | Facultative root hemiparasite | Fagaceae, Malvaceae, Moraceae                                                                                                                                                                                                                                                                                                   | May - August        | September - October |
| 3    | <i>Balanophora dioica</i> R. Brown ex Royle              | Balanophoraceae | C.E.         | 400 - 2600   | Root holoparasite             | Ericaceae ( <i>Rhododendron</i> spp.)                                                                                                                                                                                                                                                                                           | August - October    | October - November  |
| 4    | <i>Balanophora involocrata</i> J.D. Hooker               | Balanophoraceae | W.C.E.       | 2900 - 3400  | Root holoparasite             | Ericaceae ( <i>Rhododendron</i> spp.)                                                                                                                                                                                                                                                                                           | July - August       | August - September  |
| 5    | <i>Balanophora polyandra</i> Griffith.                   | Balanophoraceae | E.           | 1400 - 3000  | Root holoparasite             | Ericaceae ( <i>Rhododendron</i> spp.)                                                                                                                                                                                                                                                                                           | August - October    | September - October |
| 6    | <i>Rhopalocnemis phalloides</i> Jung.                    | Balanophoraceae | E.           | 2100 - 2200  | Root holoparasite             | Araliaceae ( <i>Dendropanax</i> spp.), Euphorbiaceae, <i>Pyralia edulis</i> , <i>Symplocos ramosissima</i> , <i>Quercus</i> spp.                                                                                                                                                                                                | N/A                 | N/A                 |
| 7    | <i>Pyralia edulis</i> (Wallich) A. Candolle              | Cervantesiaceae | W.C.E.       | 1600 - 1800  | Facultative root hemiparasite | Fagaceae, Moraceae, Santalaceae ( <i>Acanthosyris</i> , <i>Pyralia</i> , <i>Scleropyrum</i> )                                                                                                                                                                                                                                   | December - April    | August - November   |
| 8    | <i>Cuscuta chinensis</i> Lam.                            | Convolvulaceae  | C.           | 1300         | Stem holoparasite             | Amaranthaceae ( <i>Alternanthera philoxeroides</i> ), Asteraceae, Berberidaceae ( <i>Berberis</i> spp.), Chenopodiaceae, Euphorbiaceae ( <i>Utrapha curacas</i> ), Hydrangeaceae ( <i>Dichroa febrifuga</i> ), Lamiaceae ( <i>Callicarpa macrophylla</i> ), Myrsinaceae ( <i>Maesa chisia</i> ), Rutaceae ( <i>Citrus</i> spp.) | December - April    | August - November   |
| 9    | <i>Cuscuta europaea</i> var. <i>indica</i> Engelm.       | Convolvulaceae  | W.C.         | 2400 - 4000  | Stem holoparasite             | Asteraceae ( <i>Artemisia indica</i> ), Berberidaceae ( <i>Berberis</i> spp.), Dipsacaceae ( <i>Dipsacus inermis</i> ), Fagaceae ( <i>Quercus semicarpifolia</i> ), Malvaceae, Pinaceae ( <i>Pinus wallichiana</i> ), Rutaceae ( <i>Zanthoxylum</i> spp.), Salicaceae ( <i>Salix</i> spp.)                                      | September - October | September - October |
| 10   | <i>Cuscuta europaea</i> var. <i>nepalensis</i> Yunker.   | Convolvulaceae  | W.           | 2300         | Stem holoparasite             | Range of plant families including Malvaceae                                                                                                                                                                                                                                                                                     | September - October | September - October |
| 11   | <i>Cuscuta gigantea</i> Griffith.                        | Convolvulaceae  | W.           | 2550         | Stem holoparasite             | Range of plant families including Malvaceae, Tamaricaceae ( <i>Tamarix</i> spp)                                                                                                                                                                                                                                                 | September - October | September - October |
| 12   | <i>Cuscuta reflexa</i> var. <i>brachystigma</i> Engelm.  | Convolvulaceae  | C.E.         | 200 - 2200   | Stem holoparasite             | Range of plant families including Malvaceae, Tamaricaceae ( <i>Tamarix</i> spp)                                                                                                                                                                                                                                                 | September - October | September - October |
| 13   | <i>Cuscuta reflexa</i> var. <i>reflexa</i> Roxb.         | Convolvulaceae  | W.C.E.       | 1100 - 3100  | Stem holoparasite             | Range of plant families including Balsaminaceae ( <i>Impatiens</i> spp.), Berberaceae ( <i>Berberis</i> spp.), Lamiaceae ( <i>Vitex negundo</i> ), Malvaceae, Tamaricaceae ( <i>Tamarix</i> spp.)                                                                                                                               | September - October | September - October |
| 14   | <i>Arceuthobium minutissimum</i> Hook.f.                 | Loranthaceae    | W.           | 3000 - 4000  | Obligate stem hemiparasite    | Pinaceae ( <i>Pinus gerardiana</i> )                                                                                                                                                                                                                                                                                            |                     |                     |
| 15   | <i>Dendrophthoe falcata</i> (L.f.) Etting.               | Loranthaceae    | W.C.E.       | 150 - 900    | Obligate stem hemiparasite    | Anacardiaceae ( <i>Mangifera indica</i> ), Euphorbiaceae Malvaceae ( <i>Bombax</i> spp.), Moraceae ( <i>Ficus</i> spp.)                                                                                                                                                                                                         | June - December     | June - December     |
| 16   | <i>Dendrophthoe pentandra</i> (L.) Miq                   | Loranthaceae    | E.           | 1200         | Obligate stem hemiparasite    | Anacardiaceae, Euphorbiaceae, Malvaceae ( <i>Bombax</i> spp.) Moraceae, and Rutaceae, Theaceae ( <i>Schimia wallichii</i> )                                                                                                                                                                                                     | June - December     | June - December     |
| 17   | <i>Helixanthera ligustrina</i> (Wall.) Danser            | Loranthaceae    | W.C.         | 900 - 1700   | Obligate stem hemiparasite    | Euphorbiaceae ( <i>Macaranga</i> spp.; <i>Mallotus philippensis</i> ), Meliaceae ( <i>Melia azedarach</i> ), Rutaceae ( <i>Zanthoxylum</i> spp.)                                                                                                                                                                                | N/A                 | N/A                 |
| 18   | <i>Helixanthera parasitica</i> Lour.                     | Loranthaceae    | E.           | 900 - 1200   | Obligate stem hemiparasite    | Euphorbiaceae, Fagaceae ( <i>Castanopsis indica</i> ), Lauraceae, Meliaceae, Moraceae, Rosaceae, Rutaceae, Theaceae                                                                                                                                                                                                             | January - July      | May - August        |
| 19   | <i>Loranthus lambertianus</i> J.H. Schultes              | Loranthaceae    | W.C.E.       | 900          | Obligate stem hemiparasite    | Fagaceae ( <i>Quercus</i> spp.)                                                                                                                                                                                                                                                                                                 | January - April     | January - April     |
| 20   | <i>Loranthus odoratus</i> Wall.                          | Loranthaceae    | C.E.         | 1600 - 2400  | Obligate stem hemiparasite    | Fagaceae ( <i>Quercus</i> , <i>Castanopsis</i> )                                                                                                                                                                                                                                                                                | February - March    | July                |
| 21   | <i>Macrosolen cochinchinensis</i> (Lour.) Tiegh          | Loranthaceae    | W.E.         | 250 - 1700   | Obligate stem hemiparasite    | Moraceae, Euphorbiaceae, Fagaceae, Lauraceae Meliaceae, Rosaceae, Rutaceae, Theaceae                                                                                                                                                                                                                                            | February - June     | May - August        |
| 22   | <i>Scurrula cordifolia</i> (Wall) G. Don                 | Loranthaceae    | W.C.E        | 1500 - 2200  | Obligate stem hemiparasite    | Apocynaceae, Euphorbiaceae, Fabaceae, Fagaceae, Lythraceae, Moraceae, Punicaceae, Rosaceae, Rutaceae, Sapindaceae, Theaceae, and Ulmaceae                                                                                                                                                                                       | N/A                 | N/A                 |
| 23   | <i>Scurrula elata</i> (Edgeworth) Danser                 | Loranthaceae    | W.C.E.       | 1600 - 2700  | Obligate stem hemiparasite    | Anacardiaceae ( <i>Mangifera indica</i> ; <i>Buchanania latifolia</i> ),                                                                                                                                                                                                                                                        | May - July          | July - August       |

|    |                                                                                 |               |         |                               |                               |                                                                                                                                                                                                                                                     |                   |                   |
|----|---------------------------------------------------------------------------------|---------------|---------|-------------------------------|-------------------------------|-----------------------------------------------------------------------------------------------------------------------------------------------------------------------------------------------------------------------------------------------------|-------------------|-------------------|
|    |                                                                                 |               |         |                               |                               | Aquifoliaceae ( <i>Ilex</i> spp.), Ericaceae ( <i>Gaultheria</i> spp.,<br><i>Rhododendron</i> spp.), Fagaceae ( <i>Quercus</i> spp.),<br>Rosaceae ( <i>Prunus</i> spp.), Vibernaceae                                                                |                   |                   |
| 24 | <i>Scurrula parasitica</i> L.                                                   | Loranthaceae  | W.C.E.  | 200 - 2200                    | Obligate stem hemiparasite    | Apocynaceae, Euphorbiaceae, Ericaceae ( <i>Rhododendron</i> spp.,<br><i>Symplocos</i> spp.) Fabaceae, Fagaceae, Lamiaceae ( <i>Vitex negundo</i> ),<br>Lythraceae, Moraceae, Punicaceae, Rosaceae, Rutaceae,<br>Sapindaceae, Theaceae, and Ulmaceae | January - October | January - October |
| 25 | <i>Scurrula parasitica</i> var. <i>graciliflora</i> (Roxb. Ex Schult.) H.S. Kiu | Loranthaceae  | W.C.E.  | 2000 - 2200                   | Obligate stem hemiparasite    | Apocynaceae, Euphorbiaceae, Fabaceae, Fagaceae,<br>Lythraceae, Moraceae, Punicaceae, Rosaceae,<br>Rutaceae, Sapindaceae, Theaceae, Ulmaceae                                                                                                         | N/A               | N/A               |
| 26 | <i>Scurrula pulverulenta</i> (Wall.) G. Don                                     | Loranthaceae  | W.C.E.  | 200 - 1400                    | Obligate stem hemiparasite    | Lauraceae, Euphorbiaceae, Rutaceae                                                                                                                                                                                                                  | March - August    | August - March    |
| 27 | <i>Taxillus umbellifer</i> (Schult.) G. Don                                     | Loranthaceae  | E.      | 1500 - 2100                   | Obligate stem hemiparasite    | Lauraceae, Euphorbiaceae, Rutaceae                                                                                                                                                                                                                  | August            | September         |
| 28 | <i>Taxillus vestitus</i> (Wall.) Danser                                         | Loranthaceae  | W.E.    | 150 - 1500                    | Obligate stem hemiparasite    | Fagaceae                                                                                                                                                                                                                                            | July - November   | July - November   |
| 29 | <i>Olax nana</i> Wall ex Benth                                                  | Olacaceae     | C.      | 1900                          | Facultative root hemiparasite | N/A                                                                                                                                                                                                                                                 | April - May       | April - May       |
| 30 | <i>Erythralum vagum</i> (Griff.) Mast                                           | Olacaceae     | C.      | 3000 - 4000                   | Facultative root hemiparasite | N/A                                                                                                                                                                                                                                                 | N/A               | N/A               |
| 31 | <i>Cansjera rheedii</i> J.F. Gmel.                                              | Opiliaceae    | C.      | 600                           | Obligate root hemiparasite    | N/A                                                                                                                                                                                                                                                 | N/A               | N/A               |
| 32 | <i>Lepionurus sylvestris</i> Blume.                                             | Opiliaceae    | E.      | 300                           | Facultative root hemiparasite | N/A                                                                                                                                                                                                                                                 | July - November   | July - November   |
| 33 | <i>Aeginetia indica</i> L.                                                      | Orobanchaceae | W.C.E   | 250 - 1700                    | Root holoparasite             | Poaceae ( <i>Miscanthus, Saccharum</i> )                                                                                                                                                                                                            | April - August    | August - October. |
| 34 | <i>Aeginetia pedunculata</i> (Roxb.) Wall.                                      | Orobanchaceae | C.      | 250                           | Root holoparasite             |                                                                                                                                                                                                                                                     |                   |                   |
| 35 | <i>Boschniakia himalaica</i> Hook. & Thomson ex Hook.                           | Orobanchaceae | C.E.    | 2900 - 4300                   | Root holoparasite             | Ericaceae ( <i>Rhododendron</i> spp.)                                                                                                                                                                                                               | April - June      | June - September  |
| 36 | <i>Buchnera cruciata</i> Hamilt.                                                | Orobanchaceae | C.      | 1400 - 1600                   | Root holoparasite             | N/A                                                                                                                                                                                                                                                 | January - April   | January - April   |
| 37 | <i>Buchnera hispida</i> Buch.-Ham ex D. Don                                     | Oronachaceae  | W.C.E   | 1500 - 1900                   | Root holoparasite             | N/A                                                                                                                                                                                                                                                 | N/A               | N/A               |
| 38 | <i>Centranthera grandiflora</i> Benth.                                          | Orobanchaceae | E.      | 200 - 1800                    | Facultative root hemiparasite | N/A                                                                                                                                                                                                                                                 | July - September  | September         |
| 39 | <i>Centranthera cochinchinensis</i> var. <i>nepalensis</i> (D. Don) Merr.       | Orobanchaceae | W.C.E   | 200 - 1800                    | Facultative root hemiparasite | N/A                                                                                                                                                                                                                                                 | August - October. | August - October. |
| 40 | <i>Euphrasia himalayica</i> Wettst.                                             | Orobanchaceae | W.C.E.  | 3200 - 4200                   | Facultative root hemiparasite | N/A                                                                                                                                                                                                                                                 | June              | June              |
| 41 | <i>Euphrasia jaeschkei</i> Wettst.                                              | Orobanchaceae | W.C.    | 3200 - 3400                   | Facultative root hemiparasite | N/A                                                                                                                                                                                                                                                 | June              | June              |
| 42 | <i>Euphrasia multiflora</i> Pennell                                             | Orobanchaceae | C.      | 3200                          | Facultative root hemiparasite | N/A                                                                                                                                                                                                                                                 | June              | June              |
| 43 | <i>Euphrasia nepalensis</i> Pugsley.                                            | Orobanchaceae | W.C.    | 2800 - 4300                   | Facultative root hemiparasite | N/A                                                                                                                                                                                                                                                 | June              | June              |
| 44 | <i>Euphrasia platyphylla</i> Pennell                                            | Orobanchaceae | W. C. E | 2700 - 3700                   | Facultative root hemiparasite | N/A                                                                                                                                                                                                                                                 | June              | June              |
| 45 | <i>Euphrasia schlagintweitii</i> Wettst                                         | Orobanchaceae | W.C.E   | 3000 - 3600                   | Facultative root hemiparasite | N/A                                                                                                                                                                                                                                                 | June              | June              |
| 46 | <i>Euphrasia simplex</i> D. Don                                                 | Orobanchaceae | C.      | 2500 - 2900                   | Facultative root hemiparasite | N/A                                                                                                                                                                                                                                                 | June              | June              |
| 47 | <i>Leptorhabdos parviflora</i> (Benth.) Benth.                                  | Orobanchaceae | W.C.    | 1700 - 2300                   | Facultative root hemiparasite | N/A                                                                                                                                                                                                                                                 | July - August     | July - August     |
| 48 | <i>Orobanche aegyptiaca</i> Pers                                                | Orobanchaceae | W.C.    | 150 - 3200                    | Root holoparasite             | Cannabaceae ( <i>Cannabis sativa</i> ), Cucurbitaceae ( <i>Cucumis melo</i> )                                                                                                                                                                       | April - June      | June - August     |
| 49 | <i>Orobanche alba</i> Steph. Ex Willd.                                          | Orobanchaceae | W.C.    | 2300 - 3700                   | Root holoparasite             | Brassicaceae                                                                                                                                                                                                                                        | April - June      | July - August     |
| 50 | <i>Orobanche cernua</i> var. <i>cernua</i> Loeffl.                              | Orobanchaceae | C.      | 2400 - 2900                   | Root holoparasite             | N/A                                                                                                                                                                                                                                                 | N/A               | N/A               |
| 51 | <i>Orobanche cernua</i> var. <i>nepalensis</i> Loeffl.                          | Orobanchaceae | C.      | 2400 - 2900                   | Root holoparasite             | N/A                                                                                                                                                                                                                                                 | N/A               | N/A               |
| 52 | <i>Orobanche coerulescens</i> Steph.                                            | Orobanchaceae | W.C.    | 2100 - 2700                   | Root holoparasite             | Asteraceae ( <i>Artemisia</i> spp.)                                                                                                                                                                                                                 | N/A               | N/A               |
| 53 | <i>Orobanche ramosa</i> L.                                                      | Orobanchaceae | W.      | Reported but never collected. | Root holoparasite             | N/A                                                                                                                                                                                                                                                 | N/A               | N/A               |
| 54 | <i>Orobanche salmsii</i> C. B. Clarke ex Hook. f                                | Orobanchaceae | W.C.    | 3400                          | Root holoparasite             | N/A                                                                                                                                                                                                                                                 | May - June        | June - August     |
| 55 | <i>Pedicularis alaschanica</i> Maxim.                                           | Orobanchaceae | C.      | 3900 - 5100                   | Facultative root hemiparasite | N/A                                                                                                                                                                                                                                                 | June - August     | September         |
| 56 | <i>Pedicularis alaschanica</i> subsp. <i>tibetica</i> (Maxim.) Tsoong           | Orobanchaceae | C.      | 4200 - 4800                   | Facultative root hemiparasite | N/A                                                                                                                                                                                                                                                 | N/A               | N/A               |
| 57 | <i>Pedicularis albiflora</i> (Hook f.) Prain                                    | Orobanchaceae | E.      | 4000 - 4500                   | Facultative root hemiparasite | N/A                                                                                                                                                                                                                                                 | N/A               | N/A               |

|    |                                                                                   |               |        |             |                                |                                 |                  |                    |
|----|-----------------------------------------------------------------------------------|---------------|--------|-------------|--------------------------------|---------------------------------|------------------|--------------------|
| 58 | <i>Pedicularis annapurnensis</i> T.Yamaz                                          | Orobanchaceae | C.     | 4200        | Faculatative root hemiparasite | N/A                             | N/A              | N/A                |
| 59 | <i>Pedicularis anserantha</i> T.Yamaz var. <i>anserantha</i>                      | Orobanchaceae | W.C.   | 3730 - 4000 | Faculatative root hemiparasite | N/A                             | N/A              | N/A                |
| 60 | <i>Pedicularis anserantha</i> T.Yamaz var. <i>elevantogaleata</i>                 | Orobanchaceae | W.C.   | 3800        | Faculatative root hemiparasite | N/A                             | N/A              | N/A                |
| 61 | <i>Pedicularis bicornuta</i> Klotzsch                                             | Orobanchaceae | C.E.   | 5300        | Faculatative root hemiparasite | N/A                             | N/A              | N/A                |
| 62 | <i>Pedicularis bifida</i> (Buch.-Ham.ex D. Don) Pennell                           | Orobanchaceae | W.C.E. | 1600 - 2550 | Faculatative root hemiparasite | N/A                             | N/A              | N/A                |
| 63 | <i>Pedicularis brevifolia</i> D. Don                                              | Orobanchaceae | C.E.   | 2510 - 4300 | Faculatative root hemiparasite | N/A                             | N/A              | N/A                |
| 64 | <i>Pedicularis breviscaposa</i> T. Yamaz                                          | Orobanchaceae | C.     | 3000 - 4000 | Faculatative root hemiparasite | N/A                             | N/A              | N/A                |
| 65 | <i>Pedicularis chamissonoides</i> T. Yamaz                                        | Orobanchaceae | C.     | 3800        | Faculatative root hemiparasite | N/A                             | N/A              | N/A                |
| 66 | <i>Pedicularis cheilanthifolia</i> Schrenk.                                       | Orobanchaceae | W.     | 2100 - 5200 | Faculatative root hemiparasite | N/A                             | June - August    | July - September   |
| 67 | <i>Pedicularis cheilanthifolia</i> subsp. <i>Nepalensis</i> T. Yamaz              | Orobanchaceae | W.     | 4200 - 4900 | Faculatative root hemiparasite | N/A                             | N/A              | N/A                |
| 68 | <i>Pedicularis clarkei</i> Hook.                                                  | Orobanchaceae | C.E.   | 3600 - 4200 | Faculatative root hemiparasite | N/A                             | N/A              | N/A                |
| 69 | <i>Pedicularis collata</i> Prain.                                                 | Orobanchaceae | E.     | 4200 - 4900 | Faculatative root hemiparasite | N/A                             | N/A              | N/A                |
| 70 | <i>Pedicularis confertiflora</i> Prain.                                           | Orobanchaceae | W.C.E. | 4100 - 4900 | Faculatative root hemiparasite | N/A                             | July - September | August - October   |
| 71 | <i>Pedicularis cornigera</i> T. Yamaz                                             | Orobanchaceae | E.     | 4100 - 4700 | Faculatative root hemiparasite | N/A                             | N/A              | N/A                |
| 72 | <i>Pedicularis denuata</i> Hook f.                                                | Orobanchaceae | C.     | 3870 - 4300 | Faculatative root hemiparasite | N/A                             | N/A              | N/A                |
| 73 | <i>Pedicularis diffusa</i> Prain                                                  | Orobanchaceae | C.     | 3300 - 4960 | Faculatative root hemiparasite | N/A                             | May - July       | May - July         |
| 74 | <i>Pedicularis elwesii</i> Hook f.                                                | Orobanchaceae | C.E.   | 3000 - 4800 | Faculatative root hemiparasite | N/A                             | June - August    | August - September |
| 75 | <i>Pedicularis excelsa</i> Hook f.                                                | Orobanchaceae | C.     | 3400        | Faculatative root hemiparasite | N/A                             | August           | August - September |
| 76 | <i>Pedicularis flexuosa</i> Hook f.                                               | Orobanchaceae | C.E.   | 3000 - 4100 | Faculatative root hemiparasite | N/A                             | June - August    | July - September   |
| 77 | <i>Pedicularis furfuracea</i> Wall.ex Benth.                                      | Orobanchaceae | C.E.   | 2700 - 4100 | Faculatative root hemiparasite | N/A                             | June - July      | July - August      |
| 78 | <i>Pedicularis gibbera</i> Prain.                                                 | Orobanchaceae | E.     | 3600 - 3700 | Faculatative root hemiparasite | N/A                             | N/A              | N/A                |
| 79 | <i>Pedicularis globifera</i> Hook f.                                              | Orobanchaceae | W.C.   | 3900 - 5500 | Faculatative root hemiparasite | Poaceae ( <i>Kabresia</i> spp.) | June - October   | June - October     |
| 80 | <i>Pedicularis gracilis</i> Wall ex Benth subsp. <i>gracilis</i>                  | Orobanchaceae | W.     | 2100 - 3300 | Faculatative root hemiparasite | N/A                             | N/A              | N/A                |
| 81 | <i>Pedicularis gracilis</i> Wall ex Benth subsp. <i>macrocarpa</i> (Prain) Tsoong | Orobanchaceae | C      | 3320        | Faculatative root hemiparasite | N/A                             | N/A              | N/A                |
| 82 | <i>Pedicularis gracilis</i> subsp. <i>stricta</i> Wall. Ex Benth                  | Orobanchaceae | W.     | 2300 - 2700 | Faculatative root hemiparasite | N/A                             | N/A              | N/A                |
| 83 | <i>Pedicularis gruiflora</i> T. Yamaz                                             | Orobanchaceae |        | 4700        | Faculatative root hemiparasite | N/A                             | N/A              | N/A                |
| 84 | <i>Pedicularis heydeii</i> Prain                                                  | Orobanchaceae | W.C.   | 4000 - 5000 | Faculatative root hemiparasite | N/A                             | N/A              | N/A                |
| 85 | <i>Pedicularis haffmeisteri</i> Klotzsch.                                         | Orobanchaceae | W.C.E. | 2300 - 3900 | Faculatative root hemiparasite | N/A                             | N/A              | N/A                |
| 86 | <i>Pedicularis hookeriana</i> Wall.                                               | Orobanchaceae | W.C.   | 2500 - 4800 | Faculatative root hemiparasite | N/A                             | N/A              | N/A                |
| 87 | <i>Pedicularis instar</i> Prain ex Maxim                                          | Orobanchaceae | E.     | 2600 - 4200 | Faculatative root hemiparasite | N/A                             | N/A              | N/A                |
| 88 | <i>Pedicularis integrifolia</i> Hook. F.                                          | Orobanchaceae | C.     | 4500 - 4800 | Faculatative root hemiparasite | N/A                             | June - July      | July - September   |
| 89 | <i>Pedicularis kansuensis</i> Maxim.                                              | Orobanchaceae | W.E.   | 3800 - 4100 | Faculatative root hemiparasite | N/A                             | N/A              | N/A                |
| 90 | <i>Pedicularis klotzschii</i> Hurus.                                              | Orobanchaceae | W.C.   | 2300 - 4500 | Faculatative root hemiparasite | N/A                             | June - August    | July - September   |
| 91 | <i>Pedicularis koshiensis</i> T. Yamaz                                            | Orobanchaceae | W. C.  | 2500 - 4800 | Faculatative root hemiparasite | N/A                             | N/A              | N/A                |
| 92 | <i>Pedicularis lachnoglossa</i> Hook. F.                                          | Orobanchaceae | E.     | 4000 - 4500 | Faculatative root hemiparasite | N/A                             | June - July      | August             |
| 93 | <i>Pedicularis longiflora</i> Rudolph subsp. <i>tubiformis</i> (Klotzsch) Tsoong  | Orobanchaceae | W.C.E. | 3300 - 5000 | Faculatative root hemiparasite | N/A                             | May - October    | May - October      |
| 94 | <i>Pedicularis megalantha</i> D. Don                                              | Orobanchaceae | C.E.   | 2800 - 4300 | Faculatative root hemiparasite | N/A                             | June - August    | July - September   |
| 95 | <i>Pedicularis megalochila</i> Li subsp. <i>longituba</i>                         | Orobanchaceae | E.     | 3500 - 4000 | Faculatative root hemiparasite | N/A                             | N/A              | N/A                |

|     |                                                                                             |               |          |             |                               |                                       |                    |                     |
|-----|---------------------------------------------------------------------------------------------|---------------|----------|-------------|-------------------------------|---------------------------------------|--------------------|---------------------|
| 96  | <i>Pedicularis microcalyx</i> Hook f.                                                       | Orobanchaceae | C.E.     | 3700 - 5500 | Facultative root hemiparasite | N/A                                   | June - August      | July - August       |
| 97  | <i>Pedicularis mollis</i> Wall .ex Benth.                                                   | Orobanchaceae | W.C.E.   | 2600 - 4500 | Facultative root hemiparasite | N/A                                   | July - September   | July - September    |
| 98  | <i>Pedicularis muguensis</i> T. Yamaz.                                                      | Orobanchaceae | W.       | 3600 - 4350 | Facultative root hemiparasite | N/A                                   | N/A                | N/A                 |
| 99  | <i>Pedicularis muscoides</i> H.L.Li                                                         | Orobanchaceae | W.C.E.   | 4500 - 5700 | Facultative root hemiparasite | N/A                                   | June - August      | July - September    |
| 100 | <i>Pedicularis muscoides</i> subsp. <i>himalayca</i> T. Yamaz.                              | Orobanchaceae | C.       | 4800 - 5850 | Facultative root hemiparasite | N/A                                   | N/A                | N/A                 |
| 101 | <i>Pedicularis nana</i> C. E. C. Fisch                                                      | Orobanchaceae | C.       | 4800 - 5100 | Facultative root hemiparasite | N/A                                   | N/A                | N/A                 |
| 102 | <i>Pedicularis nepalensis</i> Prain.                                                        | Orobanchaceae | C.E.     | 3100 - 4500 | Facultative root hemiparasite | N/A                                   | N/A                | N/A                 |
| 103 | <i>Pedicularis nodosa</i> Pennell                                                           | Orobanchaceae | C.       | 3400 - 4300 | Facultative root hemiparasite | N/A                                   | N/A                | N/A                 |
| 104 | <i>Pedicularis odontoloma</i> T. Yamaz                                                      | Orobanchaceae | W.       | 4700        | Facultative root hemiparasite | N/A                                   | N/A                | N/A                 |
| 105 | <i>Pedicularis oederi</i> subsp. <i>oederi</i> var. <i>heteroglossa</i> Vahl.               | Orobanchaceae | W.C.E.   | 3000 - 5500 | Facultative root hemiparasite | N/A                                   | N/A                | N/A                 |
| 106 | <i>Pedicularis ophicephala</i> Maxim.                                                       | Orobanchaceae | W.       | 3500 - 4000 | Facultative root hemiparasite | N/A                                   | N/A                | N/A                 |
| 107 | <i>Pedicularis oxyrhyncha</i> T. Yamaz.                                                     | Orobanchaceae | C.E.     | 3900 - 4400 | Facultative root hemiparasite | N/A                                   | N/A                | N/A                 |
| 108 | <i>Pedicularis pantlingii</i> subsp. <i>pantlingii</i> Prain.                               | Orobanchaceae | C.E.     | 3800 - 4200 | Facultative root hemiparasite | N/A                                   | July - August      | August - September  |
| 109 | <i>Pedicularis paradoxa</i> (Prain) T. Yamaz                                                | Orobanchaceae | E.       | 4300 - 4400 | Facultative root hemiparasite | N/A                                   | N/A                | N/A                 |
| 110 | <i>Pedicularis pauciflora</i> (Prain) Pennell                                               | Orobanchaceae | E.       | 3600 - 4600 | Facultative root hemiparasite | N/A                                   | N/A                | N/A                 |
| 111 | <i>Pedicularis pectinata</i> Wall.ex Benth.                                                 | Orobanchaceae | W.       | 3000 - 4000 | Facultative root hemiparasite | N/A                                   | N/A                | N/A                 |
| 112 | <i>Pedicularis poluninii</i> P.C. Tsoong                                                    | Orobanchaceae | C.       | 4000 - 4700 | Facultative root hemiparasite | N/A                                   | N/A                | N/A                 |
| 113 | <i>Pedicularis porrecta</i> Wall.                                                           | Orobanchaceae | W.       | 3000 - 4000 | Facultative root hemiparasite | N/A                                   | N/A                | N/A                 |
| 114 | <i>Pedicularis pseudoregeliana</i> P.C. Tsoong                                              | Orobanchaceae | C.E.     | 4000 - 4600 | Facultative root hemiparasite | N/A                                   | N/A                | N/A                 |
| 115 | <i>Pedicularis regeliana</i> Prain.                                                         | Orobanchaceae | C.E.     | 3200 - 4500 | Facultative root hemiparasite | N/A                                   | N/A                | N/A                 |
| 116 | <i>Pedicularis rhinanthoides</i> Schrenk subsp. <i>labelata</i> (Jacquem.) Prain ex Pennell | Orobanchaceae | C.       | 3000 - 4100 | Facultative root hemiparasite | N/A                                   | N/A                | N/A                 |
| 117 | <i>Pedicularis rhinanthoides</i> subsp. <i>tibetica</i> (Bonati) P.C. Tsoong                | Orobanchaceae | E.       | 4200 - 4600 | Facultative root hemiparasite | N/A                                   | May - July         | August - September  |
| 118 | <i>Pedicularis roylei</i> subsp. <i>megalantha</i> P.C. Tsoong                              | Orobanchaceae | W.       | 3800 - 5600 | Facultative root hemiparasite | N/A                                   | N/A                | N/A                 |
| 119 | <i>Pedicularis roylei</i> subsp. <i>roylei</i> Maxim.                                       | Orobanchaceae | W.C.E    | 3600 - 4000 | Facultative root hemiparasite | Ericaceae ( <i>Rhododendron</i> spp.) | July - August      | August - September  |
| 120 | <i>Pedicularis roylei</i> var. <i>speciosa</i> (Prain) T. Yamaz                             | Orobanchaceae | W.C.E.   | 3600 - 4000 | Facultative root hemiparasite | N/A                                   | N/A                | N/A                 |
| 121 | <i>Pedicularis schizorrhyncha</i> Prain.                                                    | Orobanchaceae | C.       | 4200 - 4900 | Facultative root hemiparasite | N/A                                   | August - September | September           |
| 122 | <i>Pedicularis scullyana</i> Prain ex Maxim.                                                | Orobanchaceae | W.C.E.   | 3400 - 5000 | Facultative root hemiparasite | N/A                                   | N/A                | N/A                 |
| 123 | <i>Pedicularis sectifolia</i> T. Yamaz.                                                     | Orobanchaceae | W. C. E. | 3400 - 4300 | Facultative root hemiparasite | N/A                                   | N/A                | N/A                 |
| 124 | <i>Pedicularis sikkimensis</i> Bonati ex W. W. Sm.                                          | Orobanchaceae | C.       | 4000 - 4450 | Facultative root hemiparasite | N/A                                   | N/A                | N/A                 |
| 125 | <i>Pedicularis siphonantha</i> D. Don                                                       | Orobanchaceae | W.C.E.   | 3000 - 4400 | Facultative root hemiparasite | N/A                                   | June - July        | July - August       |
| 126 | <i>Pedicularis tamurensis</i> T. Yamaz.                                                     | Orobanchaceae | E.       | 2800 - 3400 | Facultative root hemiparasite | N/A                                   | N/A                | N/A                 |
| 127 | <i>Pedicularis tenuicaulis</i> Prain                                                        | Orobanchaceae | E.       | 4000        | Facultative root hemiparasite | N/A                                   | July - August      | August - September  |
| 128 | <i>Pedicularis terreniflora</i> T. Yamaz.                                                   | Orobanchaceae | E.       | 2000 - 2200 | Facultative root hemiparasite | N/A                                   | N/A                | N/A                 |
| 129 | <i>Pedicularis trichodonta</i> T. Yamaz.                                                    | Orobanchaceae | E.       | 3600 - 4500 | Facultative root hemiparasite | N/A                                   | N/A                | N/A                 |
| 130 | <i>Pedicularis trichoglossa</i> Hook. F.                                                    | Orobanchaceae | W.C.E.   | 4000 - 4500 | Facultative root hemiparasite | N/A                                   | July - August      | August - September. |
| 131 | <i>Pedicularis tsoongii</i> T. Yamaz                                                        | Orobanchaceae | W.       | 3800        | Facultative root hemiparasite | N/A                                   | N/A                | N/A                 |
| 132 | <i>Pedicularis wallichii</i> Bunge                                                          | Orobanchaceae | W.C.E.   | 4000 - 4500 | Facultative root hemiparasite | N/A                                   | June - August      | August              |
| 133 | <i>Pedicularis yalungensis</i> T. Yamaz.                                                    | Orobanchaceae | C.       | 4300 - 5300 | Facultative root hemiparasite | N/A                                   | N/A                | N/A                 |
| 134 | <i>Pedicularis yamazakiana</i> R. R. Mill                                                   | Orobanchaceae | W.       | 3405        | Facultative root hemiparasite | N/A                                   | N/A                | N/A                 |

|     |                                                                  |               |        |             |                               |                                                                                                                                                                                                                                                           |                      |                       |
|-----|------------------------------------------------------------------|---------------|--------|-------------|-------------------------------|-----------------------------------------------------------------------------------------------------------------------------------------------------------------------------------------------------------------------------------------------------------|----------------------|-----------------------|
| 135 | <i>Phtheirospermum glandulosum</i> (Benth.) Benth ex Hook. F.    | Orobanchaceae | W.E.   | 1800 - 2600 | Facultative root hemiparasite | N/A                                                                                                                                                                                                                                                       | N/A                  | N/A                   |
| 136 | <i>Striga angustifolia</i> (D. Don) C. J. Saldanha               | Orobanchaceae | W.C.   | 580 - 1900  | Obligate root hemiparasite    | N/A                                                                                                                                                                                                                                                       | September - December | September - December  |
| 137 | <i>Striga asiatica</i> (L.) Kuntze                               | Orobanchaceae | W.C.E. | 500 - 1500  | Obligate root hemiparasite    | Poaceae ( <i>Saccharum</i> spp.)                                                                                                                                                                                                                          | September - December | September - December. |
| 138 | <i>Striga gesnerioides</i> (Willd.) Vatke                        | Orobanchaceae | W.     | 1350 - 1700 | Obligate root hemiparasite    | Poaceae ( <i>Saccharum</i> spp.)                                                                                                                                                                                                                          | N/A                  | N/A                   |
| 139 | <i>Striga masuria</i> (Buch.-Ham.ex Benth.) Benth.               | Orobanchaceae | E.     | 900 - 1100  | Obligate root hemiparasite    | Poaceae ( <i>Saccharum</i> spp.)                                                                                                                                                                                                                          | N/A                  | N/A                   |
| 140 | <i>Osyris quadripartita</i> Salzm. ex Decne.                     | Santalaceae   | W.C.   | 900 - 2200  | Facultative root hemiparasite | N/A                                                                                                                                                                                                                                                       | April - June         | October               |
| 141 | <i>Osyris wightiana</i> (Santalaceae)                            | Santalaceae   | C.E.   | 1100 - 2600 | Facultative root hemiparasite | N/A                                                                                                                                                                                                                                                       | N/A                  | N/A                   |
| 142 | <i>Thesium emodi</i> Hendrych                                    | Santalaceae   | C.     | 2900 - 4100 | Facultative root hemiparasite | N/A                                                                                                                                                                                                                                                       | N/A                  | N/A                   |
| 143 | <i>Thesium himalense</i> Royle                                   | Santalaceae   | C.     | 1300 - 4000 | Facultative root hemiparasite | N/A                                                                                                                                                                                                                                                       | June                 | August - September    |
| 144 | <i>Santalum album</i> L.                                         | Santalaceae   | W.C.E. | 600 - 1200  | Facultative root hemiparasite | N/A                                                                                                                                                                                                                                                       | N/A                  | N/A                   |
| 145 | <i>Schoepfia fragrans</i> Wall.                                  | Schoepfiaceae | C.E.   | 1400 - 1800 | Obligate root hemiparasite    | N/A                                                                                                                                                                                                                                                       | September - December | October - March       |
| 146 | <i>Viscum articulatum</i> var. <i>articulatum</i> Burm.          | Viscaceae     | W.C.   | 1500 - 2100 | Obligate stem hemiparasite    | Mauraceae, Lauraceae, Lythraceae ( <i>Punica granatum</i> ), Oleaceae                                                                                                                                                                                     | January - December   | January - December    |
| 147 | <i>Viscum articulatum</i> var. <i>liquidambaricolum</i> Burm. F. | Viscaceae     | W.C.E. | 200 - 2200  | Obligate stem hemiparasite    | Cornaceae ( <i>Cornus capitata</i> ), Fagaceae ( <i>Quercus glauca</i> , <i>Quercus semicarpifolia</i> ), Ericaceae ( <i>Rhododendron</i> spp.), Lauraceae, Lythraceae, Moraceae ( <i>Ficus religiosa</i> ), Oleaceae, Rosaceae ( <i>Prunus cornuta</i> ) | January - December   | January - December    |
| 148 | <i>Viscum loranthei</i> Elmer                                    | Viscaceae     | W.C.   | 1200 - 2600 | Obligate stem hemiparasite    | Lauraceae, Loranthaceae ( <i>Macrosolen cochinchinensis</i> ), Lythraceae, Moraceae, Oleaceae,                                                                                                                                                            | March - May          | March - May           |
| 149 | <i>Viscum monoicum</i> Roxb.ex DC.                               | Viscaceae     | C.     | 980 - 1000  | Obligate stem hemiparasite    | Dipterocarpaceae ( <i>Shorea robusta</i> ), Lauraceae, Lythraceae, Moraceae, Oleaceae,                                                                                                                                                                    | March - December     | March - December      |
| 150 | <i>Viscum multinerve</i> (Hayata) Hayata                         | Viscaceae     | C.     | 1800        | Obligate stem hemiparasite    | Fagaceae ( <i>Castanopsis indica</i> ), Lauraceae, Lythraceae, Moraceae Oleaceae                                                                                                                                                                          | April - December     | April - December      |
| 151 | <i>Viscum album</i> L.                                           | Viscaceae     | W.C.   | 600 - 2650  | Obligate stem hemiparasite    | Lauraceae, Lythraceae, Moraceae, Oleaceae, Rosaceae (Pyrus spp.)                                                                                                                                                                                          | November - March     | July - December       |
