# Supplementary material for: An ethnobotanical analysis of parasitic plants (Parijibi) in the Nepal Himalaya
Source: PubMed Central journal article supplement (PMC4765049; doi:10.1186/s13002-016-0086-y), 2016-02-24
Supplement: 13002_2016_86_MOESM2_ESM.pdf [file 13002_2016_86_MOESM2_ESM.pdf]

**Appendix II.** Parasitic plant species found in Nepal. Nepal-specific data, including host species, are presented. (Shrestha 1998; Oleg and Stainton 2000; Manandhar 2002; Press et al. 2000), KATH 2013; TUCH 2013; TPL 2013; eFloras 2013; Tropicos 2013).

**Key:** Distribution information is abbreviated by E (Eastern), C (Central), and W (West) based on Nepal's three vegetative zones. N/A denotes where information is not available.

| S.No. | Species                                               | Family        | Distribution | Altitude (m) | Habit           | Host               | Flowering Time     | Fruiting Time       |
|-------|-------------------------------------------------------|---------------|--------------|--------------|-----------------|--------------------|--------------------|---------------------|
| 1     | <i>Burmannia disticha</i> L.                          | Burmanniaceae | C.E          | 1500 - 2600  | Mycoheterotroph | N/A                | April - June       | June - September    |
| 2     | <i>Burmannia nepalensis</i> (Miers) Hook.f.           | Burmanniaceae | E.           | 1600         | Mycoheterotroph | N/A                | July - December    | July - December.    |
| 3     | <i>Monotropa hypopithys</i> L.                        | Ericaceae     | W.C.         | 2400 - 3700  | Mycoheterotroph | Fagaceae, Pinaceae | July - August      | September - October |
| 4     | <i>Monotropa uniflora</i> L.                          | Ericaceae     | C.E.         | 900 - 3800   | Mycoheterotroph | Fagaceae, Pinaceae | August - October   | October - November  |
| 5     | <i>Monotropastrum humile</i> (D. Don) H. Hara         | Ericaceae     | C.E.         | 2200 - 3200  | Mycoheterotroph | N/A                | April - August     | May - September     |
| 6     | <i>Exacum nanum</i> Klack.                            | Gentianaceae  | E.           | 1700         | Mycoheterotroph | N/A                | N/A                | N/A                 |
| 7     | <i>Eulophia bicallosa</i> (D. Don) Hunt & Summerhayes | Orchidaceae   | C.           | 2000 - 2500  | Mycoheterotroph | N/A                | June               | June                |
| 8     | <i>Eulophia dabia</i> (D. Don) Hochreutiner           | Orchidaceae   | W.C.         | 2000         | Mycoheterotroph | N/A                | April - May        | May - June          |
| 9     | <i>Eulophia explanata</i> Lindl.                      | Orchidaceae   | C.           | 1200         | Mycoheterotroph | N/A                | N/A                | N/A                 |
| 10    | <i>Eulophia flava</i> (Lindl.) Hook.f.                | Orchidaceae   | C.           | 400          | Mycoheterotroph | N/A                | April - June       | June                |
| 11    | <i>Eulophia graminea</i> Lindl.                       | Orchidaceae   | C.           | 900 - 2100   | Mycoheterotroph | N/A                | April - May        | May - June          |
| 12    | <i>Eulophia spectabilis</i> (Dennst.) Suresh          | Orchidaceae   | C.E.         | 450 - 1700.  | Mycoheterotroph | N/A                | April - June       | April - June        |
| 13    | <i>Galeola lindleyana</i> (Hook.f & Thomson) Rchb.f.  | Orchidaceae   | E.           | 1800 - 2800  | Mycoheterotroph | N/A                | May - August       | September - October |
| 14    | <i>Neottia acuminata</i> Schltr.                      | Orchidaceae   | W.C.         | 3200 - 3400  | Mycoheterotroph | N/A                | June - August      | September - October |
| 15    | <i>Neottia listeroides</i> Lindl.                     | Orchidaceae   | W.C.         | 3000 - 3200  | Mycoheterotroph | N/A                | July - September   | September - October |
| 16    | <i>Cephalanthera longifolia</i> (L.) Fritsch          | Orchidaceae   | W.C          | 1200 - 3200  | Mycoheterotroph | N/A                | May - June         | September - Octoer  |
| 17    | <i>Epipogium aphyllum</i> Sw.                         | Orchidaceae   | W.C          | 3000 - 3400  | Mycoheterotroph | N/A                | August - September | October             |
| 18    | <i>Epipogium roseum</i> (D.Don) Lindl.                | Orchidaceae   | C.           | 1200 - 3600  | Mycoheterotroph | N/A                | August - September | October             |
