# Supplementary material for: An ethnobotanical analysis of parasitic plants (Parijibi) in the Nepal Himalaya
Source: PubMed Central journal article supplement (PMC4765049; doi:10.1186/s13002-016-0086-y), 2016-02-24
Supplement: 13002_2016_86_MOESM4_ESM.pdf [file 13002_2016_86_MOESM4_ESM.pdf]

Participant ID \_\_\_ / \_\_\_ / \_\_\_ / \_\_\_

Date: \_\_\_ / \_\_\_ / \_\_\_  
D D M M Y Y**Appendix IV:** Semi-structured questionnaire for an ethnobotanical analysis of parasitic plants in the Nepal Himalaya.**An Ethnobotanical Analysis of Parasitic Plants in the Nepal Himalaya***Researcher: Alexander Robert O'Neill and Santosh Kumar Rana*

*Thank you for taking time to talk with me today. My purpose in talking with you is to learn about environmental change in Sikkim, including your interactions with wetlands, species utilization, and opinions on environmental change. You should know that the things you tell us here will remain confidential; we will not share the information you give us with your colleagues or any official in a way that you will be able to be identified.*

I freely and willingly consent to the following survey.

Signature: \_\_\_\_\_

**A. DEMOGRAPHICS**

| No  | QUESTIONS                                                          | CODES                                                                                                                                                 |
|-----|--------------------------------------------------------------------|-------------------------------------------------------------------------------------------------------------------------------------------------------|
| A1  | What type of work do you do:                                       | (1) Agro-pastoralist (2) NGO/ Non-Profit<br>(3) Education (8) Government Worker/Military<br>(4) Health/Medical (9) Trade/Technical<br>5) Other: _____ |
| A2  | What is your gender?                                               | (1) Female (2) Male (3) Other _____                                                                                                                   |
| A3  | What is your preferred language for the survey?                    | (1) English (2) Nepali (3) Other _____                                                                                                                |
| A4  | How old are you?                                                   | _____ years                                                                                                                                           |
| A5  | What is your household status?                                     | (1) Single (3) Separated/Divorced (Skip 6)<br>(2) Married (4) Widowed (Skip 6)                                                                        |
| A6  | Do you live with your partner?                                     | (0) No (1) Yes                                                                                                                                        |
| A7  | How many children do you have?                                     | _____ children                                                                                                                                        |
| A8  | How many people live in your house - share meals) (including you): | Adults: _____<br>Children under 15 years: _____                                                                                                       |
| A10 | What is the highest grade of school you have completed?            | A. School class _____<br>B. Professional Training: _____ years: _____<br>C. Post-secondary education (type): _____<br>How many years: _____           |
| A11 | How long have you been working as a [_____]:                       | _____ years _____ months <b>OR</b> Year started _____                                                                                                 |
| A12 | Where do you live?                                                 | _____                                                                                                                                                 |
| A13 | How long have you lived there?                                     | _____ years _____ months <b>OR</b> Year started _____<br><b>OR</b> Always (If always, Skip A14)                                                       |
| A14 | Originally, where are you from?                                    | City/Neighborhood: _____                                                                                                                              |
| A15 | What languages do you speak?                                       | (1) English (2) Hindi<br>(3) Nepali (4) Tibetan<br>(5) Other(s): _____                                                                                |
| A16 | What is your ethnicity?                                            | (1) Nepali (2) Tamang (3) Gurung (4) Lepcha<br>(5) Chhetri (6) Bhutia (7) Sherpa (8)<br>Subba/Limbu<br>(9) Other _____                                |

**B. PLANT STATUS**

| No  | QUESTIONS                                                                                                                                             | CODES                                                                                              |
|-----|-------------------------------------------------------------------------------------------------------------------------------------------------------|----------------------------------------------------------------------------------------------------|
| B1  | Have you seen this plant before?                                                                                                                      | (1) Yes (2) No                                                                                     |
| B2  | Does this plant have a (vernacular) name?                                                                                                             | Name:<br>Notes:                                                                                    |
| B3  | Where can this plant be found?                                                                                                                        | (1) Forest (2) Field (3) Other<br>(A) Cultivated (B) Wild-harvested (C) Wild                       |
| B4  | Does this plant grow alongside, on, or near other plants?<br>If so, which species?                                                                    | (1) Alongside (2) On (3) Near (4) None<br>Notes:                                                   |
| B5  | Does this plant influence the growth of the plants or plant communities where it is found?                                                            | (1) Promotes Growth (2) Hinders Growth<br>(3) No Effect (4) Unknown<br>Notes:                      |
| B6  | How would you describe the growth habit of this plant?                                                                                                |                                                                                                    |
| B7  | Are there other plants in this area that have similar habits?                                                                                         | (1) Yes (2) No (3) Unknown<br>Notes:                                                               |
| B8  | Is this plant more common now or when you were a child?                                                                                               | (1) More Common (2) Less Common<br>(3) No Change (4) Unknown                                       |
| B9  | If there has been a change, why do you think populations of this plant have changed?                                                                  | (1) Over-harvest (2) Deforestation<br>(3) Climate Changing<br>(4) Unknown (5) Other _____<br>Note: |
| B10 | Do people collect this plant?                                                                                                                         | (1) Yes (2) No (Unknown)                                                                           |
| B11 | If collected or cultivated, has the amount of cultivation or collection changed from when you were a child to now? this plant of conservation concern | (1) More (2) Less (3) Unchanged (4) Unknown<br>(A) Yes (B) No<br>Notes:                            |

## C. ETHNOBOTANICAL USES

| No  | QUESTIONS                          | CODES                                                                                                                       |
|-----|------------------------------------|-----------------------------------------------------------------------------------------------------------------------------|
| C1  | Is this plant used by local people | (1) Yes (2) No (3) Unknown                                                                                                  |
| C2  | If so, what types of uses:         | Notes:                                                                                                                      |
| C2A | Food                               | When is it used? _____<br>What parts are used? _____<br>Do many people use it? _____<br>How is it prepared? _____<br>Notes: |
| C2B | Medicine                           | When is it used? _____<br>What parts are used? _____<br>Do many people use it? _____<br>How is it prepared? _____<br>Notes: |
| C3C | Material and/or Fodder             | When is it used? _____<br>What parts are used? _____<br>Do many people use it? _____<br>How is it prepared? _____<br>Notes: |
| C3D | 'Cultural' and Other               | When is it used? _____<br>What parts are used? _____<br>Do many people use it? _____<br>How is it prepared? _____<br>Notes: |
