# Supplementary material for: An ethnobotanical analysis of parasitic plants (Parijibi) in the Nepal Himalaya
Source: PubMed Central journal article supplement (PMC4765049; doi:10.1186/s13002-016-0086-y), 2016-02-24
Supplement: 13002_2016_86_MOESM5_ESM.pdf [file 13002_2016_86_MOESM5_ESM.pdf]

| Collection # | Collection Date | Species                                                 | Family         | Altitude (m) | District  |
|--------------|-----------------|---------------------------------------------------------|----------------|--------------|-----------|
| ARO1         | 11/12/13        | <i>Cuscuta europaea</i> var. <i>indica</i>              | Convolvulaceae | 2500         | Kaski     |
| ARO2         | 11/20/13        | <i>Cuscuta chinensis</i>                                | Convolvulaceae | 1300         | Kathmandu |
| ARO3         | 11/26/13        | <i>Viscum articulatum</i> var. <i>liquidambaricolum</i> | Viscaceae      | 2000         | Makwanpur |
| ARO4         | 12/04/13        | <i>Pending Identification</i>                           | Loranthaceae   | 2200         | Parbat    |
| ARO5         | 04/14/14        | <i>Loranthus odoratus</i>                               | Loranthaceae   | 2000         | Ilam      |
| ARO6         | 04/15/14        | <i>Scurulla parasitica</i> var. <i>graciliflora</i>     | Loranthaceae   | 2200         | Ilam      |
| ARO7         | 04/17/14        | <i>Macrosolen cochinchinensis</i>                       | Loranthaceae   | 500          | Jhapa     |
| ARO8         | 04/21/14        | <i>Cuscuta chinensis</i>                                | Convolvulaceae | 375          | Jhapa     |
| ARO9         | 04/21/14        | <i>Cuscuta reflexa</i> var. <i>reflexa</i>              | Convolvulaceae | 60           | Jhapa     |
| ARO10        | 04/22/14        | <i>Cuscuta reflexa</i> var. <i>reflexa</i>              | Convolvulaceae | 80           | Morang    |
| ARO11        | 04/22/14        | <i>Dendrophthoe pentandra</i>                           | Loranthaceae   | 80           | Morang    |
| ARO12        | 04/26/14        | <i>Cuscuta reflexa</i> var. <i>reflexa</i>              | Convolvulaceae | 120          | Bara      |
| ARO13        | 04/26/14        | <i>Cuscuta reflexa</i> var. <i>reflexa</i>              | Convolvulaceae | 120          | Rautahat  |
| ARO14        | 04/28/14        | <i>Dendrophthoe falcata</i>                             | Loranthaceae   | 120          | Rautahat  |
| ARO15        | 04/30/14        | <i>Viscum articulatum</i>                               | Viscaceae      | 2100         | Makwanpur |
| ARO16        | 04/30/14        | <i>Viscum articulatum</i> var. <i>articulatum</i>       | Viscaceae      | 2100         | Makwanpur |
| ARO17        | 04/30/14        | <i>Viscum articulatum</i> var. <i>articulatum</i>       | Viscaceae      | 2000         | Kathmandu |
| ARO18        | 04/30/14        | <i>Cuscuta europea</i> var. <i>indica</i>               | Convolvulaceae | 1800         | Kathmandu |
| ARO19        | 04/30/14        | <i>Cuscuta reflexa</i> var. <i>reflexa</i>              | Convolvulaceae | 1500         | Kathmandu |
| ARO20        | 04/30/14        | <i>Viscum album</i>                                     | Viscaceae      | 2100         | Makwanpur |
| ARO21        | 04/30/14        | <i>Helixanthera ligustrina</i>                          | Loranthaceae   | 1600         | Makwanpur |
| ARO22        | 04/30/14        | <i>Helixanthera ligustrina</i>                          | Loranthaceae   | 1300         | Kathmandu |
| ARO23        | 04/30/14        | <i>Scurulla elata</i>                                   | Loranthaceae   | 1700         | Makwanpur |
| ARO24        | 04/30/14        | <i>Scurulla parasitica</i>                              | Loranthaceae   | 1800         | Makwanpur |
| ARO25        | 04/30/14        | <i>Taxillus vestitus</i>                                | Loranthaceae   | 1700         | Makwanpur |
| ARO26        | 04/30/14        | <i>Taxillus umbellifer</i>                              | Loranthaceae   | 2800         | Makwanpur |
| ARO26        | 04/30/14        | <i>Scurulla elata</i>                                   | Loranthaceae   | 1700         | Makwanpur |
| ARO28        | 04/30/14        | <i>Helixanthera parasitica</i>                          | Loranthaceae   | 1500         | Makwanpur |
| ARO29        | 04/30/14        | <i>Loranthus lamertianus</i>                            | Loranthaceae   | 1600         | Makwanpur |
| ARO30        | 04/30/14        | <i>Pending Identification</i>                           | Loranthaceae   | 1700         | Makwanpur |
| ARO31        | 04/30/14        | <i>Pending Identification</i>                           | Loranthaceae   | 1600         | Makwanpur |
| ARO32        | 04/30/14        | <i>Scurulla pulverulenta</i>                            | Loranthaceae   | 1600         | Makwanpur |
| ARO33        | 04/30/14        | <i>Pending Identification</i>                           | Loranthaceae   | 1600         | Makwanpur |
| ARO34        | 05/10/14        | <i>Scurulla parasitica</i>                              | Loranthaceae   | 2200         | Kaski     |
| ARO35        | 05/10/14        | <i>Scurulla pulverulenta</i>                            | Loranthaceae   | 2100         | Kaski     |
| ARO36        | 05/10/14        | <i>Scurulla elata</i>                                   | Loranthaceae   | 2100         | Kaski     |
| ARO37        | 05/15/14        | <i>Scurulla pulverulenta</i>                            | Loranthaceae   | 1600         | Nuwakot   |
| ARO38        | 05/15/14        | <i>Cuscuta reflexa</i> var. <i>reflexa</i>              | Convolvulaceae | 1600         | Nuwakot   |
| SKR39        | 06/25/13        | <i>Monotropa uniflora</i>                               | Ericaceae      | 1500         | Lalitpur  |
